# Supplementary material for: Mechanism of Malignancy Development When the Metabolism of the Human Body Deteriorates
Source: Preprints.org preprint supplement (doi:10.20944/preprints202403.0985.v2), 2024-08-21
Supplement: Supplementary file 1 [file supplementary]

## Sheet: Sheet1
pH
	cancer	usually
7	6.7	6.8
8	6.7	6.8
9	6.4	6.8
10	7.1	6.7
11	6.7	6.7
12	6.1	6.7
13	6.7	6.7
14	6.7	6.1
15	6.7	6.4
16	6.7	6.7
17	6.7	6.1
18	6.1	6.7
19	6.4	6.1
20	6.4	6.4
21	6.1	6.4
22	6.4	6.1
23	6.4	6.1
24	6.4	6.4
25	6.4	6.4
26	6.7	6.4
27	6.4	6.1
28	6.7	6.7
29	6.7	6.7
30	6.4	6.2
31	6.7	6.2
32	6.7	6.7
33	6.7	6.4
34	6.7	6.7
35	6.7	6.7
36	6.7	6.7
37	6.4	6.8
38	6.7	6.4
39	6.7	6.7
40	6.8	6.7
41	6.7	6.7
42	6.7	6.7
43	6.7	6.1
44	6.4	6.4
45	6.1	6.7
46	6.7	6.7
47	6.1	6.4
48	6.4	6.7
49	6.4	6.1
50	6.1	6.8
51	6.1	6.7
52	6.7	6.7
53	6.4	6.2
54	6.7	6.2
55	6.7	6.7
56	6.4	6.4
57	6.2	6.7
58	6.4	6.7
59	6.1	6.4
60	6.4	6.7
61	6.4	6.8
62	6.4	6.4
63	6.1	6.7
64	6.2	6.7
65	6.7	6.7
66	6.4	6.7
67	6.7	6.4
68	6.7	6.2
69	6.7	6.4
70	death	6.7
71		6.7
72		6.7
73		6.4
74		6.7
75		6.2
76		6.7
77		6.7
78		6.4
79		6.8
80		6.8
81		6.8
82		6.7
83		6.7
84		6.7
85		6.7
86		6.1
87		6.4
88		6.7
89		6.1
90		6.7
91		6.1
92		6.4
93		6.4
94		6.1
95		6.1
96		6.4
97		5.5
98		5
		death
